# Supplementary material
Source: PubMed Central journal article supplement (PMC1134693)
Supplement: bj3850243add.pdf [file bj3850243add.pdf]

## Supplementary Tables

**Supplementary Table 1. Oligonucleotide primer pairs and DNA templates used for construction of *Mlo* variants using splicing by overlap extension (SOE) <sup>a</sup>**

| Construct in pBluescript | PCR Primers             | PCR Template     | Description of resulting <i>Mlo</i> variant        |
|--------------------------|-------------------------|------------------|----------------------------------------------------|
| C86A                     | CE4+PSL508              | <i>HvMlo</i>     | <i>HvMlo</i> cDNA with Cys-86 changed to Ala       |
|                          | PSL507+CE23             | <i>HvMlo</i>     |                                                    |
| C98A                     | CE4+CE54                | <i>HvMlo</i>     | <i>HvMlo</i> cDNA with Cys-98 changed to Ala       |
|                          | CE53+CE23               | <i>HvMlo</i>     |                                                    |
| C114A                    | CE4+CE56                | <i>HvMlo</i>     | <i>HvMlo</i> cDNA with Cys-114 changed to          |
|                          | CE55+CE23               | <i>HvMlo</i>     | Ala                                                |
| C367A                    | PSL373+CE58             | <i>HvMlo</i>     | <i>HvMlo</i> cDNA with Cys-367 changed to          |
|                          | CE57+CE6                | <i>HvMlo</i>     | Ala                                                |
| P287G                    | Mlo P287G-<br>1+ADDOWN6 | <i>HvMlo</i>     | <i>HvMlo</i> cDNA with Pro-287 changed to<br>Gly   |
|                          | Mlo P287G-<br>1+ADUP7   | <i>HvMlo</i>     |                                                    |
|                          |                         |                  |                                                    |
| P395G                    | Mlo P395G-<br>1+ADDOWN6 | <i>HvMlo</i>     | <i>HvMlo</i> cDNA with Pro-395 changed to<br>Gly   |
|                          | Mlo P395G-<br>1+ADUP7   | <i>HvMlo</i>     |                                                    |
|                          |                         |                  |                                                    |
| TaMLOA1 CT               | PSL373+CE42             | <i>HvMlo</i>     | <i>HvMlo</i> cDNA with <i>TaMlo</i> -A1 C-terminus |
|                          | CE43+CE44               | <i>TaMlo</i> -A1 |                                                    |
| TaMLOB1 CT               | PSL373+CE47             | <i>HvMlo</i>     | <i>HvMlo</i> cDNA with <i>TaMlo</i> -B1 C-terminus |
|                          | CE43+CE44               | <i>TaMlo</i> -B1 |                                                    |
| OsMLO1 CT                | PSL373+CE47             | <i>HvMlo</i>     | <i>HvMlo</i> cDNA with <i>OsMlo1</i> C-terminus    |
|                          | CE48+CE28               | <i>OsMlo1</i>    |                                                    |
| ATMLO11 CT               | PSL373+PSL510           | <i>HvMlo</i>     | <i>HvMlo</i> cDNA with <i>AtMlo11</i> C-terminus   |

|                     |               |                  |                                                      |
|---------------------|---------------|------------------|------------------------------------------------------|
|                     | PSL509+PSL511 | <i>AtMlo11</i>   |                                                      |
| CT swap A417S       | KS727+KS739   | CT swap          | <i>HvMlo</i> cDNA with distal half of <i>TaMlo</i> - |
|                     | KS738+CE44    | CT swap          | B1 C-terminus and Ala-417 changed to Ser             |
| CT swap A453S       | KS727+KS741   | CT swap          | <i>HvMlo</i> cDNA with distal half of <i>TaMlo</i> - |
|                     | KS740+CE44    | CT swap          | B1 C-terminus and Ala-453 changed to Ser             |
| RDM ( $\Delta$ 40)  | PSL373+CE37   | <i>HvMlo</i>     | <i>HvMlo</i> cDNA -40 amino acids at C-terminus      |
| VHL ( $\Delta$ 67)  | PSL373+CE35   | <i>HvMlo</i>     | <i>HvMlo</i> cDNA -67 amino acids at C-terminus      |
| SPM ( $\Delta$ 77)  | PSL373+CE34   | <i>HvMlo</i>     | <i>HvMlo</i> cDNA -77 amino acids at C-terminus      |
| QMI ( $\Delta$ 89)  | PSL373+CE33   | <i>HvMlo</i>     | <i>HvMlo</i> cDNA -89 amino acids at C-terminus      |
| KVR ( $\Delta$ 99)  | PSL373+CE32   | <i>HvMlo</i>     | <i>HvMlo</i> cDNA -99 amino acids at C-terminus      |
| NWR ( $\Delta$ 109) | PSL373+CE25   | <i>HvMlo</i>     | <i>HvMlo</i> cDNA -109 amino acids at C-terminus     |
| DEQ ( $\Delta$ 118) | PSL373+CE26   | <i>HvMlo</i>     | <i>HvMlo</i> cDNA -118 amino acids at C-terminus     |
| MLO IC2+CT          | PSL373+PSL123 | <i>HvMlo</i>     | <i>HvMlo</i> cDNA with IC2 and C-terminus of         |
|                     | PSL122+PSL124 | <i>TaMlo</i> -B1 | <i>TaMlo</i> -B1                                     |
|                     | 39+CE23       | <i>HvMlo</i>     |                                                      |
| MLO IC2             | PSL373+PSL123 | <i>HvMlo</i>     | <i>HvMlo</i> cDNA with IC2 of <i>TaMlo</i> -B1       |
|                     | PSL122+PSL124 | <i>TaMlo</i> -B1 |                                                      |
|                     | 39+CE23       | <i>HvMlo</i>     |                                                      |
| MLO                 | CE4+KS730     | <i>HvMlo</i>     | <i>HvMlo</i> cDNA with IC1, IC2, and C-              |
| IC1+IC2+CT          | KS728+KS729   | <i>TaMlo</i> -B1 | terminus of <i>TaMlo</i> -B1                         |

<sup>a</sup> plasmid constructs MLO IC1, MLO IC1+IC2, and MLO IC1+CT were generated by replacement of suitable restriction fragments

---

**Supplementary Table 2. Sequences of PCR oligonucleotide primers used in this study**


---

| <b>Primer name</b> | <b>Primer sequence</b>                   |
|--------------------|------------------------------------------|
| 39                 | 5'-TCGACTTCCACAAGTACA-3'                 |
| ADDOWN6            | 5'-CTAGAATTCTCATCCCTGGCTGAAGG-3'         |
| ADUP7              | 5' CTCAAGCTTGCCACCATGTCGGACAAAAAAGGGG 3' |
| CE4                | 5'-TCACACAGGAAACAGCTATGAC-3'             |
| CE6                | 5'-CGCCAGGGTTTTCCAGTCACGAC-3'            |
| CE23               | 5'-CATATAGCTGCAGAGGAA-3'                 |
| CE25               | 5'-GCGAATTCACCGCCAGTTGGTGAGCG-3'         |
| CE26               | 5'-GCGAATTCAGTCTCGTCGAAGATGG-3'          |
| CE28               | 5'-GCGAATTCACCGTTGTGCGCTGAA-3'           |
| CE32               | 5'-GCGAATTCATCGGACTTTCTTCTTCTCCT-3'      |
| CE33               | 5'-GCGAATTCAGATCATCTGAGCCATCAGCA-3'      |
| CE34               | 5'-GCGAATTCACATCGGCGACGAGCCTCGGC-3'      |
| CE35               | 5'-GCGAATTCACAGGTGCACGGGTGATGAGC-3'      |
| CE37               | 5'-GCGAATTCACATGTCCCTAGCCTCCTGCT-3'      |
| CE42               | 5'-TTTGATCCCATCTGTGTGACGAGCGCGTAGAG-3'   |
| CE43               | 5'-TCACACAGATGGGATCAAACATGAAGAG-3'       |
| CE44               | 5'-GCGAATTCATCCCTGGCTGAAGGA-3'           |
| CE47               | 5'-CGATCCCATCTGTGTGACGAGCGCGTAGAG-3'     |
| CE48               | 5'-GCACACAGATGGGATCGAACATGAAGAA-3'       |
| CE53               | 5'-TGGCCCGCCAAGCGCGGCACCGAGG-3'          |
| CE54               | 5'-GCGCTTGGCGGGCCACATGACGTCGG-3'         |
| CE55               | 5'-GTTGACTACGCCCCGGAGGGC-3'              |
| CE56               | 5'-GCCCTCCGGGGCGTAGTCAAC-3'              |
| CE57               | 5'-AAGAAAGCCTACCACACGCAGATCG-3'          |

|             |                                      |
|-------------|--------------------------------------|
| CE58        | 5'-GTGTGGTAGGCTTTCTTCAAGCCGGGC-3'    |
| KS727       | 5'-CAGTTCCTCTGCAGCTATA-3'            |
| KS728       | 5'-CAGCATGAGCTCCGCCT-3'              |
| KS729       | 5'-TCCGTCCTCCTGGAGCACGCGCTCC-3'      |
| KS730       | 5'-GTGCTCCAGGAGGACGGACACGAGC-3'      |
| KS738       | 5'-GCAGACGTCCAAGGCGCTAACAAAC-3'      |
| KS739       | 5'-CGCCTTGGACGTCTGCTCGTCGAAG-3'      |
| KS740       | 5'-GCCCCGAGGGTCGTCGCCCATGCCTAGC-3'   |
| KS741       | 5'-GCGACGACCCTCGGCTGGGCGT-3'         |
| Mlo P287G-1 | 5'-ATTTCTTTCATCGGTCTCGTGATCCTC-3'    |
| Mlo P287G-2 | 5'-GAGGATCACGAGACCGATGAAAGAAAT-3'    |
| Mlo P395G-1 | 5'-TATATGACCTTCGGCCTCTACGCGCTC-3'    |
| Mlo P395G-2 | 5'-GAGCGCGTCGAGGCCGAAGGTCATATA-3'    |
| PSL122      | 5'-GCTCTAAGCCGTCTCAA-3'              |
| PSL123      | 5'-TTGAGACGGCTTAGAGC-3'              |
| PSL124      | 5'-TGTACTTGTGGAAGTCGA-3'             |
| PSL373      | 5'-GGCGGAGCTCATGCTG-3'               |
| PSL507      | 5'-CAAGATAGCCATCTCCGAGGATGCCG-3'     |
| PSL508      | 5'-TCGGAGATGGCTATCTTGGCGATGATGGGG-3' |
| PSL509      | 5'-TCACACAGATGGGAACGAACTATAAAA-3'    |
| PSL510      | 5'-CGTTCCCATCTGTGTGACGAGCGCGTAG-3'   |
| PSL511      | 5'-GCGAATTCAGACTCTCTTCTCACT-3'       |

---

Supplement 3. CLUSTALW (<http://www.ebi.ac.uk/clustalw/>) amino acid alignment of 38 full-size MLO sequences. For origin of protein sequences see Materials and methods. Please note that two invariant cysteine residues corresponding to Cys 86 and Cys 114 in barley MLO were not correctly aligned by the CLUSTALW algorithm. In addition, the tryptophane corresponding to W330 in barley MLO is not recognized as an invariant residue due to an ambiguous amino acid in OsMLO6 (here shown as X).

```

MLO -----MSDKKGV-----ARELPETPSWAVAVF 24
TaMLO2-B1 -----MADDEYPP-----ARTLPETPSWAVALVF 25
HvMLO2 -----MAGP--AG-----GRELSDTPTWAVAVVC 22
OsMLO1 -----MAGGR--SG-----SRELPEPTWAVAVVC 23
OsMLO2 -----MAGG--GG-----GRALPEPTWAVAVVC 22
ZmMLO1 -----MAGG--GG-----GRDLPSTPTWAVAVVC 22
AtMLO2 -----MADQVK-----ERTLEETSTWAVAVVC 22
AtMLO6 -----MADQVK-----EKTLEETSTWAVAVVC 22
AtMLO12 -----MAIK-----ERSLEETPTWAVAVVC 20
AtMLO5 -----MAGGGGGSTSGEGPRE-----LDQTPTWAVSTVC 29
AtMLO9 -----MAGGGGG--GEGPRQ-----LDQTPTWAVSTVC 28
AtMLO7 --MITRS-RCRRSLLWFLVFHGGATATGAPSGGKE-----LSQTPTWAVAVVC 45
AtMLO10 --MATRCFWCWTTLLFCSQLLTGFARASSAGGAKEKG-----LSQTPTWAVAVVC 48
AtMLO8 MGIIDGSLRRLICLCLWCLLGGGVTVVTAEDEKKVV-----HKQLNQTPTWAVAAVC 53
ZmMLO6 -----MGGGGGGNSRE-----LDQTPTWAVAVVC 25
OsMLO4 -----MSGSGGGGGGAGGDGARA-----LDQTPTWAVAAVC 32
ZmMLO2 -----MGGDTRA-----LDQTPTWAVAAVC 21
AtMLO3 -----MTDKEESNHSSEVGA-----VRSLQETPTWALATVC 31
OsMLO7 -----MEESS-----ITHPTWVAVVC 18
ZmMLO7 -----MGKEAT-----LAFTPTWVVAIVC 19
OsMLO9 -----MGAGEGEEQS-----LALTPTWVAVVC 24
AtMLO13 -----MAEARSGS-----LEYTPTWVAVFIC 21
HvMLO3 -----MAGGGGKAKP-----LEFTPTWIVALVC 23
OsMLO10 -----MAGGGGKAAAGGGEAPAITLEHTPTWIVSAVC 32
OsMLO3 -----MAATEATT-----IEDTPTWIVAAVC 21
ZmMLO3 -----MSEEAT-----LEDTPTWIVAVVC 19
OsMLO8 -----MAAE-----AATLEFTPTWIVAAVC 20
ZmMLO8 -----MAAEGE-----AAALEFTPTWIVAAVC 22
OsMLO5 -----MARAEA-----AAALEFTPTWIVAAIC 22
AtMLO1 -----MGHGGE-----GMSLEFTPTWVAVVC 22
AtMLO15 -----MAGG-----GTTLEYTPTWVAVVC 20
PpMLO1 -----MAGGED-----EKSLEATPTWAVAAVC 22
OsMLO11 -----MVEEG-----RSLAETPTWSVAVTC 20
ZmMLO4 -----MAAEQG-----RSLAETPTWSVAVTC 21
AtMLO4 -----MEHMMKEG-----RSLAETPTYSVASVV 23
AtMLO11 -----MGEENGNEADSNE-----RSLALSPTWSVAIVL 30
AtMLO14 -----MREETEPSE-----RTLGLTPTWSVAVTL 24
OsMLO6 -----MAGGXGGGAAAVPEEG-----RSLALTPTWSVAIVL 31
: : : : :

```

MLO AAMVLVSVLMEHGLHKLGHWFQHRHKKALWEALEKMKAEMLLVGFISLLLIVTQDPIIAK 84  
TaMLO2-B1 AVMIIVSVLLEHALHKLGHWFHKKRNALAEALEKIKAEMLLVGFISLLAVTQDPISG 84  
HvMLO2 AVMILVSVAMEHALHKLGHWFHKKRNALAEALEKIKAEMLLVGFISLLLIVTQDPVSR 81  
OsMLO1 AVLVLVSAAMEHGLHNLSHWFRRRQKKAMGDALDKIKAEMLMLGFISLLLTVAQAPI SK 82  
OsMLO2 AVIVLVSAMEHGLHKLGHWFHKKREKKAMGEALEKIKAEMLMLGFISLLLTVAQTPISK 81  
ZmMLO1 AVIVLVSAMEHGLHKLGHWFHTRQKKAMREALEKIKAEMLMLMGFISLLLAVGQTPISK 81  
AtMLO2 FVLLFISIVLEHSIHKIGTWFKKKHKQALFEALEKVKAEMLMLGFISLLLTIGQTPISN 81  
AtMLO6 FVLLLISIVIEKLIHKIGSGFKKKNKALYEALEKVKAEMLMLMGFISLLLTIGQGYISN 81  
AtMLO12 FVLLFISIMIEYFLHFIHWFKKKKALSEALEKVKAEMLMLGFISLLLVVLQTPVSE 79  
AtMLO5 GVIILISIVLELMIHKIGEVFTERRKKALYEALQIKNELMVLGFISLLTTFGQNYIAS 88  
AtMLO9 GVIILISILELIHKGVEVFERKKKALFEALEKIKNELMVLGFISLLTTFGQNYIAS 87  
AtMLO7 TFLILISHLLEKGLQRLANWLWKKHKNLSLEALEKIKAEMLMLGFISLLTTFGEPYILK 104  
AtMLO10 TFFILVSVLLEKALHRVATWLWEKHKNSLLEALEKIKAEMLMLGFISLLTTFGEYILK 107  
AtMLO8 TFFIVVSVLLEKLLHKVGVLDWRHTALLDALEKIKAEMLLVGFISLLTTFGQTYILD 112  
ZmMLO6 GVIIVLISILLEKGLHVGVEFFSHRKKKAMVEALEKVKAEMLMLGFISLLLVFGQNYI IK 84  
OsMLO4 AVIVAASILLEGLLHHLGQWFSKRKKKALFDALEKVKSEMLTLGFISLLSVTGRYISR 91  
ZmMLO2 AVIVAASILLEGFLHHLGQLLNKKRKKALFDALEKVKSEMLTLGFISLLTGTGRYIAR 80  
AtMLO3 FFFIAVSIICLERLINLLSTRLKKNRKTSLLEAVEKLSVLMVLGFMMLNVTEGEVSK 90  
OsMLO7 FAIVSVSLAAERLLHHLGKFLKHKDQKALYSALERLKEELMLLGFISFVLSLSEGFIVG 77  
ZmMLO7 LVIVVSLAAERLSLHHLGKYLECKKQKALFSALQRLKEELMLLGFISFVLSLSEQGFIVS 78  
OsMLO9 FIIIVASLAAERLLH-LHQVLKFNQGEALFSALQRVKEELMLLGFISFLLSVFQKFINH 82  
AtMLO13 FIIIVLLSLLAERGLHHLGKCLKRRQDQALFEALQKLEELMLLGFISMLTVSQAARIH 80  
HvMLO3 SVMVVIISLLFERLLHRLGKRLIRSRKKPLYEALLKVEELMLLGFISLLTTFVQGPMPGK 82  
OsMLO10 FVIVIIISLLFERLLHRLGKRLKRSRKKPLYEGLLKVKEELMLLGFISLLLNVFQGLTQK 91  
OsMLO3 SAIVLISFAFERSLHHLGKALER-RRRTLYEALLKLEELMLLGFISLLLVVFQEPQIR 79  
ZmMLO3 SVIVLISFVFERALHHLGKALER-RRKTYEALLKLEELMLLGFVSLLVVVSQDLIQK 77  
OsMLO8 SLMVLISLVAERCLHHLGK-LKRKNQKPLYEALLKVEELMLLGFISLLTTFVQGLIQR 78  
ZmMLO8 SLIVLISLVAERCLHHLGKTLKRKNQKPLFEALLKVKEELMLLGFISLLTTFVQGMIRR 81  
OsMLO5 SLIVLISLAAERCLHHLGKTLKRKNQKALFEALLKVKEELMLLGFISLLTTFVQGLIQK 81  
AtMLO1 TVIVAISLAVERLLHYFGTVLKKKQKPLYEALQKVEELMLLGFISLLTTFVQGLISK 81  
AtMLO15 SVIVSISFAVERLIHRAGKHFKNNDQKQKALFQKIKKEELMLLVGFISLLSVGQSKIAK 79  
PpMLO1 AVFVVASLVVERGLEHLGHQLKKKRQQLLHTLGKIKDELMLLGFISLSLTVFQSKIAS 81  
OsMLO11 TLMVAACFLVERGISRFAKWLRKTKRKAAMLALEKIREELMLLGVISLLSQTARWISEI 80  
ZmMLO4 TLMVAACFLVERISLRFKWLKTKRKAAMLALEKIREELMLLGVISLLSQTARFISEI 81  
AtMLO4 TVLVFVCFLVERAIYRFGKWLKTRKALFTSLEKMKKEELMLLGLISLLSQSARWISEI 83  
AtMLO11 TVFVVVSLIVERSIYRLSTWLRKTKRKPFAALEKMKKEELMLLGFISLLTATSSTIANI 90  
AtMLO14 TIFVFSLIVERSIHRLSNWLQKTKRKLFAALEKMKKEELMLLGFISLLTATSSTIANI 84  
OsMLO6 TLLVAGSLIERSIHRLSYWLKTKRNLPHKAMEKMKKEELMLLGFISLLLAATSRIISGI 91  
: : . \* : : : : : : : : : : \* : \* : \* : \*

|           |                                                             |     |
|-----------|-------------------------------------------------------------|-----|
| MLO       | ICISEDAADVMPCK-----R                                        | 100 |
| TaMLO2-B1 | ICISEKAASIMRCK-----L                                        | 100 |
| HvMLO2    | ICISKEAGEKMLPCKPYDGAGGG---KGKDNHR-----RLLWL                 | 116 |
| OsMLO1    | ICIPKSAANILLPCKAGQDAIE-----                                 | 104 |
| OsMLO2    | ICIPESAANIMLPCKAGQDIVKGLK-GKKDHRR-----RLLWY                 | 118 |
| ZmMLO1    | ICIPAKAGSIMLPCKPPKGAAAAADDDKSDGRR-----RLLWY                 | 119 |
| AtMLO2    | ICISQKVA STMHPCSAEEAKYKGGK DAGKKDDGDG-----DKPGRRL           | 124 |
| AtMLO6    | ICIPKNIAASMHPCSASEEARKEYGKKDVPEDE-----EENLRK                | 121 |
| AtMLO12   | ICIPRNIAATWHPCSNHQEI AKYKDYID-----DGRKI                     | 113 |
| AtMLO5    | LCVASRYGHAMSF CGPYDGPS-GESKKPKTTEH-----                     | 120 |
| AtMLO9    | ICVPSRYGHAMSF CGPYDGPS EDRK KKKTDHAMR-----                  | 123 |
| AtMLO7    | ICVPRKAALSMLPCLSEDTVLFQ-----KLAPSS-----                     | 133 |
| AtMLO10   | ICIPKAAASMLPCPAPSTHDQD-----KTH-----                         | 133 |
| AtMLO8    | ICIPSHVARTMLPCPAPNLKKEDDNGESHRRLLS-----                     | 147 |
| ZmMLO6    | VCISNHAANTMLPCKLEAAAVGKDGHGKEAAAVVAGKKKVVAVVPGKKKKKAAAAADHL | 144 |
| OsMLO4    | ICIPVGAADTMLPCSLRRSSSEQE-----VPGGGG-----                    | 121 |
| ZmMLO2    | ICIPEGAANTMLPCRLSGHSVAEE-----PKG-----                       | 107 |
| AtMLO3    | ICIPIKYANRMLPCRKT IKSHNDVSED-----                           | 117 |
| OsMLO7    | ICVSENAHMLPCK-----                                          | 92  |
| ZmMLO7    | ICIPETSTDFMLPCN-----                                        | 93  |
| OsMLO9    | ICIPESA AHLMLPCIT-----                                      | 98  |
| AtMLO13   | ICVPPALVNNMFPCKKPLE-----EHH-----                            | 102 |
| HvMLO3    | VCVSPITMLHLQPK-----PPPDETDHLG-----                          | 107 |
| OsMLO10   | ICVKASVMDHLQPK-----LDFSGAKTAK-----                          | 116 |
| OsMLO3    | ICIAESLMGHWLP CR-SDG-----KASSHHGVAA-----                    | 107 |
| ZmMLO3    | ICIDDSLMEHWMPCRGASA-----TASAHYGVSS-----                     | 106 |
| OsMLO8    | TCIPPRWTVHMLPCQR-----EAVGPAKEH-----                         | 103 |
| ZmMLO8    | TCIPERWTFHMLPCEKPD-----EKAGEAATM-----                       | 108 |
| OsMLO5    | TCVPPKWTNYLLPCRKMED-----QSKQRPSEAH-----                     | 111 |
| AtMLO1    | FCVKENVLMHMLPCSLDSRREAGASEHKNVTAKEHF-----                   | 117 |
| AtMLO15   | ICISKEELSEKFLPCTKPAG-----AEKSLKDSSH-----                    | 108 |
| PpMLO1    | ICMPERLNKFM LCP-----YK-----                                 | 98  |
| OsMLO11   | CVPSSLFTSRFYICSETDYEDLVVGGKRSTMEMNQ T-----                  | 116 |
| ZmMLO4    | CVPSSLFTSRFYICSESDYQDLLRN-----TDANQT-----                   | 112 |
| AtMLO4    | CVNSSLFN SKFYICSEEDYGIHKKV LLEHTSSTNQ S-----                | 119 |
| AtMLO11   | CVPSSFYNDRFLPCTRSEIQEELES-----GSTVKRN-----                  | 122 |
| AtMLO14   | CVSSSFHNDRFV PCTPSEINELEST---ISTVKRT-----                   | 117 |
| OsMLO6    | CIDSKYYNSNFSPCTREEVEESIKIKH--AVSSARK-----                   | 125 |

\*

MLO G----TEGRKPSKYVD-----YCP-----EGKVALMSTGSLHQLHVFI FVLAVFHVT 143  
TaMLO2-B1 P----P-GSVKSKYKDY-----YCAK----QGKVALMSTGSLHQLHIFIFVLAVFHVT 144  
HvMLO2 Q----GESETHRRFLAAPAGVD-VCAK----QGKVALMSAGSMHQLHIFIFVLAVFHV 166  
OsMLO1 -----EEAASGRRLSLAGAGGD-YCSKF---DGKVALMSAKSMHQLHIFIFVLAVFHVT 154  
OsMLO2 T----GEEESHRRSLAGAAGED-YCAQ---SGKVALMSSGGMHQLHIFIFVLAVFHVT 168  
ZmMLO1 PYPYGYDEPGHRRFLAGAAPDDNYCSD----QGKVSLISSAGVHQLHIFIFVLAVFHIV 175  
AtMLO2 LLELAES--YIHRRLATKGYDK--CAE----KGKVAFVSAYGIHQHIFIFVLAVVHV 176  
AtMLO6 LLQLVDS--LIPRRSLATKGYDK--CAE----KGKVAFVSAYGMHQLHIFIFVLAVCHVI 173  
AtMLO12 LEDFDSNDFYSPRRNLATKGYDK--CAE----KGKVALVSAYGIHQHIFIFVLAVFHVT 167  
AtMLO5 -----LERRVLADAAPAQCK-----KGVPLISLNLALHQLHIFIFFLAVFHVI 163  
AtMLO9 -----ILYSVQRRLADAPPVNC-----KDYVALISLNLALHQLHIFIFFLAVFHVI 170  
AtMLO7 -----LSRHLLAAGDTS-INCK-----QGSEPLITLKGHLHQLHILLFFLAIFHIV 177  
AtMLO10 -----RRRLAAATTS-SRCD-----EGHEPLIPATGLHQLHILLFFMAAFHIL 175  
AtMLO8 -----FEHRFLSGGEASPTKCTK----EGYVELISAEALHQLHILLFFLAIFHIV 193  
ZmMLO6 GGVDWPPPYAHNARMLAEASMATKCP----EGKVPLISLNLALHQLHIFIFFLAVFHVS 200  
OsMLO4 -----HGRRHLSGDPTN-FKCA----KGMVSLVSADGLHQLHIFVFLAVFHVA 165  
ZmMLO2 -----HGRRHLSGDPTNLFSCR----KGMVSLVSADGMHQLHIFVFLAVFHVT 152  
AtMLO3 -----DDDDGDNDNSFFHQCSS---KGKTSLSIEGLTQLSYFFVFLACMHIL 164  
OsMLO7 --KETYQ-----LSEG-VKLCKKK---GEVPLLSVEALHQLHIFIFILGLVHV 135  
ZmMLO7 --RGNSR-----VAEEGAKICNKK---GDVPLLSLEALHQLHIFIFVLGLVHV 137  
OsMLO9 --RETSE-----TTEDASKLCKRK---GEVPLMSSEALHQLHIFIFVLGIVHV 142  
AtMLO13 -APKSSHSIINNARHLLSTGESPDHCAK---GQVPLVSVEALHQLHIFIFVLAVFHVI 157  
HvMLO3 -DAVFAGVLGGRRLLAGGASDEYCLKK---DKVPLLSSEALHQLHIFIFVLAVTHFL 162  
OsMLO10 -TTAHLAAG-VRRLLAGGGAKSDYCEKKVLVGLVPLSVEALHQLHIFIFVLAVSHV 174  
OsMLO3 -ASAAVSGAGARRLLGEGTAGSGHCSK---GKVPLLSLHAIEQIHIFIFVLAITHV 162  
ZmMLO3 -SSSSAVGGG-RRMLKGGGAAFHGCSK---GKVPLLSLHAIEQVHIFIFVLAITQV 160  
OsMLO8 -VAAAQIVGRIGRRLLEGGGAEALCQKK---GKVPLLSLEALHQLHIFIFVLAITHV 158  
ZmMLO8 -EHFVGTLLGRIGRRLLEGGTAGAEQCQKK---GKVPLLSLEALHQLHIFIFVLAITHV 163  
OsMLO5 -FVAAGVLGHLGRRLADGGTGADHCQNK---GKVPLLSLEALHQLHIFIFVLAITHV 166  
AtMLO1 -QTFPIVGTTRRLAEHAAVQVGYCSEK---GKVPLLSLEALHQLHIFIFVLAISHV 172  
AtMLO15 -FQFS----FTGRHLLAGDAPAGDYCSLK---GKVPIMSLSALHELHIFIFVLAVAH I 159  
PpMLO1 -AGAVVDATAAAGHRRLLATSSPVTCPSEG-----QVQVISVSGLHQLHIFIFVMAIVHVI 152  
OsMLO11 -VVPNGLFGIQSQ-----NVCSEVG---HEPFVSYEGLEQLHRFLFILGITHV 161  
ZmMLO4 -ALDKNMFQQRL-----HVCGEG-----HEPFVSYEGLEQLHRFLFILGITHV 156  
AtMLO4 -SLPHHGIHEAS-----HQCCHG-----REPFVSYEGLEQLRFLFVLGITHV 162  
AtMLO11 -LLTKSLFFNIFRRRLDV--IKRTTCEG-----HEPFVSYEGLEQLHRFIFIMAVTHV 174  
AtMLO14 -QLTRSLFLHTLRRRLSG--IGEDTCEG-----HEPFVSYEGLEQLHRFIFIMAVTHV 169  
OsMLO6 -HLIEVILHHAARRNLKARYHHNQSCAEG-----YESFVSHEGLEQLHRFIFIMAVTHV 179

.: .: .: .:\*.:. :.



|           |                                                              |     |
|-----------|--------------------------------------------------------------|-----|
| MLO       | YSVITIALSRLKMRWTWKKWETETTSLEYQFAN-----DPAFRFRFTHQTSFVKRH     | 192 |
| TaMLO2-B1 | YSVIIMALSRLKMRWTWKKWETETASLEYQFAN-----DPAFRFRFTHQTSFVKRH     | 193 |
| HvMLO2    | YSVVTMTLSRLKMKQWKKWESETASLEYQFAN-----DPSRCRFRFTHQTTLVRRH     | 215 |
| OsMLO1    | YCIITMGLGRLKMKKWKWESQTNLSLEYQFAI-----DPSRFRFRFTHQTSFVKRH     | 203 |
| OsMLO2    | YCVITMALGRLKMKKWKWWELETNSLEYQFAN-----DPSRFRFRFTHQTSFVKRH     | 217 |
| ZmMLO1    | YSVATMALGRLKMRKWKWWESETNSLEYQYAN-----DPSRFRFRFTHQTSFVKRH     | 224 |
| AtMLO2    | YCIVITYAFGKIKMRTWKSWEETTKTIEYQYSN-----DPERFRFARDTSFGRRH      | 225 |
| AtMLO6    | YCIVITYALGKTKMRRWKKWEETTKTIEYQYSH-----DPERFRFARDTSFGRRH      | 222 |
| AtMLO12   | YCIITYALGKTKMKKWKWERETTKTIEYQYAN-----DPERFRFARDTSFGRRH       | 216 |
| AtMLO5    | YSAITMMLGRAKIRGWKVVWEEVIN-DHEMMN-----DPSRFRFRFTHQTSFVREH     | 211 |
| AtMLO9    | YSAITMMLGRAKIRGWKVWEQEVIIH-EQEMMN-----DPSRFRFRFTHQTSFVREH    | 218 |
| AtMLO7    | YSLITMMLSRLKIRGWKWEQETLSNDYEFESI-----DHSRLRLTHETSFVREH       | 226 |
| AtMLO10   | YSFITMMLGRLKIRGWKWEQETCSHDYEFESI-----DPSRFRFRFTHQTSFVROH     | 224 |
| AtMLO8    | YSFLTMLLGRKIRGWKHENETSSHNYEFST-----DTSRFRFRFTHQTSFVRAH       | 242 |
| ZmMLO6    | YSAITMALGRAKIRAWKWEKEAAGQDYEFESH-----DPTFRFRFTHQTSFVROH      | 249 |
| OsMLO4    | FSAITMSLGRAKTRIRWKWEKETCSLTIEYFSY-----DPSKFRFRFTHQTSFVROH    | 214 |
| ZmMLO2    | FSFFTMSLGRAKTRIRWKWEKETCSQYNYLN-----DPSKFRFRFTHQTSFVROH      | 201 |
| AtMLO3    | CNLAILLGMAKMRKWNWEKETQTVVEYLAAN-----DPNFRFRITRDTTFARRH       | 213 |
| OsMLO7    | FCATTILLGGAKIRKWLWETEIQEQEMQKCKLVVVQKRDPGRIAHN--QQGEFVSR     | 193 |
| ZmMLO7    | FCATTISFSGAKMRKWKHWETEIHREVEHEKLQEQKNEGQSSLSIVVLHREHQDEFVHKR | 197 |
| OsMLO9    | FCVTLLLLGGAKMKKWEKWEKEIQGRTKER-----PKR                       | 176 |
| AtMLO13   | FCASTMVLGGARIQQWKHWEDWFKRPSQKGTTRRGHHAHAHELFSANH----EFFEMH   | 212 |
| HvMLO3    | LSAITVLLGMAQTRNWRHWETKIQEKDDS-----APQMIKHVREFKFIQDH          | 208 |
| OsMLO10   | LSAVTVLLGIAQTRKQHWENKIQASDEN-----GPQMIKHVQEFPPFIKNH          | 220 |
| OsMLO3    | LSAVTVLLGLLQMRWRHWENAIKADGDF-----ERSNSSSSR-----DR            | 202 |
| ZmMLO3    | LSVATVLLGLLQMRIWMHWENTIQQEGSS-----APKMIARVQKIRFIIQDR         | 206 |
| OsMLO8    | FVSMTMLGGAKIHQWKQWEVEIQKDAVG-----SGPAKVTHVHQFEFINDH          | 205 |
| ZmMLO8    | FSVTMLLGGAQIHQWKQWENGIKKDAPG-----NGP-KVTNVHHHEFIKRR          | 209 |
| OsMLO5    | FSALTMLGGAKIHQWKHWENDIQKDAVQ-----NAPKKVTHVHQFEFIRER          | 213 |
| AtMLO1    | FCVLTVIFGSTRIHQWKWEDSIADEKFDPET-----ALRKRFRVTHVHNHAFIKEH     | 223 |
| AtMLO15   | FCLLTIVFGTMKIQQWKWEDKVLEKDFDT-----DQSIKKFTHVQEHFIRSR         | 208 |
| PpMLO1    | YSAATVLLGLWQVHEWKSWEQSVQYDICEFEKALG-----KKPNAEVALEGRMRYKF    | 205 |
| OsMLO11   | YTFVTVVL SMK IYSWRKFETQACQLPTEQLQ-----ARR-TKVMQRQSTFVPHH     | 210 |
| ZmMLO4    | YSFVTVVL SMK IYSWRKWETLAGPIAAEELK-----ARR-TKVMRRQSTFVFNH     | 205 |
| AtMLO4    | YSGIAIGLAMSK IYSWRKWEAQAI IMAESDIH-----AKK-TKVMKRQSTFVPHH    | 211 |
| AtMLO11   | YSCLTMLLAIVK IHSWR IWEDEVARLDRHDCLT-----AVAREKIFRRQTTFVQYH   | 224 |
| AtMLO14   | YSCLTMLLAIVK IHRWR IWEDEVHMDRNDCLT-----VVAREKIFRRQTTFVQYH    | 219 |
| OsMLO6    | YSCLTMLLAILK IHSWRKWEDEAFRDNHESFS-----QIAYISATRRQPALGRSY     | 229 |

: . : \* : \*

MLO LG-LSSTP-GIRWVVAFFRQFFRSVTKVDYLTLRAGFINAHLSONS--KFDFHKYIKRSM 248  
TaMLO2-B1 LG-LSSTP-GVRWVVAFFRQFFRSVTKVDYFTLRAGFINAHLSONS--KFDFHKYIKRSM 249  
HvMLO2 LG-LSSTP-GVRWVVAFFRQFFTSVTKVDYLTLRQGFINAHLSONS--RFDFHKYIKRSL 271  
OsMLO1 LGSFSSTP-GLRWIVAFFRQFFGSVTKVDYLTMRQGFINAHLSONS--KFDFHKYIKRSL 260  
OsMLO2 LG-LSSTP-GLRWIVAFFRQFFGSVTKVDYLTMRQGFINAHLSONS--KFDFHKYIKRSL 273  
ZmMLO1 LG-LSSTP-GVRWVVAFFRQFFASVTKVDYLTMRQGFINYHLSPST--KFNFQYIKRSL 280  
AtMLO2 LNFWSKTR-VTLWIVCFRQFFGSVTKVDYLALRHGFIMAHFAPGNESRFDFRKYIQRSL 284  
AtMLO6 LSFWSKST-ITLWIVCFRQFFRSVTKVDYLTLRHGFIMAHLPAGSDARFDFRKYIQRSL 281  
AtMLO12 LNIWSKST-FTLWITCFRQFFGSVTKVDYLTLRHGFIMAHLPAGSAARFDFQKYIERSL 275  
AtMLO5 VNPWAKNR-FSFYVMCFRQMLRSVTKSDYLTMRHGFISVHLAPGM--KFNFQYIKRSL 268  
AtMLO9 VNSWASNK-FFFYVMCFRQILRSVTKSDYLTMRHGFISVHLAPGM--KFDFQYIKRSL 275  
AtMLO7 TSFWTTTP-FFFYVGCFFRQFFVSVERTDYLTLRHGFISAHLPAGR--KFNFQYIKRSL 283  
AtMLO10 SSFVTKIP-FFFYAGCFLQFFRSVGRDYLTLRHGFIAAHLAPGR--KFDFQYIKRSL 281  
AtMLO8 TSFWTRIP-FFFYVGCFFRQFFRSVGRDYLTLRNGFIAVHLAPGS--QFNFQYIKRSL 299  
ZmMLO6 MNVLNKF-ASFYISNFFRQFFRSVTKADYCALRHGFVNVHLAPGS--KFDFQYIKRSL 306  
OsMLO4 ASCWSKST-ILLYFVSFFRQFFRSVRRDYLTLRHGFIAAHLSLGT--RFNFRKYIKRSL 271  
ZmMLO2 ASCWSKST-ITLYFVSFFRQFFRSVTKDYFTLRHGFISAHLPAGT--RFNFRKYIKRSL 258  
AtMLO3 LSSWTETS-FQLWIKCFRQFYNSVAKVDYLTLRHGFIFAHVSSNN--AFNFQYIQRSL 270  
OsMLO7 TKGLWMKLAVVSWIIAFFKQFHDSVSKSDYKALRSFGLKHFPSHP--SFNFYKYLIRAL 251  
ZmMLO7 TKGFWMKLAVASWIIAFFKQFQDSVSKSDYEALRSFVVEHYPEKP--DIDFHKYIMTRAV 255  
OsMLO9 PG--WMKFIVVRCASIFLKQFYDSVSKPDYQVLRSAF--RHYPNRP--DFDFHKYIMVRAL 230  
AtMLO13 AGGFWRRSVVISWVRSFFKQFYGSVTKSEYIALRQAFIMSHCRTNP--SFDFHKYMLRTL 270  
HvMLO3 FKDHRKRSRIFAWMRSFFKQFYGSITEEDYTTMRLGFIKMKCKGTP--KFNFYSYIMIRAL 266  
OsMLO10 FKGHGKRWTKFGWLRSLKQFYGSVTEEDYVTMRLGFIKMKHCRGNP--KFNFYKYMIRAL 278  
OsMLO3 YKGFDKVTMVIWIMRSFFKQFYGSVTKDDYTAMRLGFVMEHFRGHP--KFNFYDYMIKAL 260  
ZmMLO3 CKGYEKAAWVIIWLRSLKQFYGSVSNDDYIAMRLGFVMEHFRGHP--KFNFYDYMIKAL 264  
OsMLO8 FKGMGKDSKILSWLHSFVKQFYGSVSKSDYTTMRLGFIIMTHCRGNP--KFDFHKYIMMVRAL 263  
ZmMLO8 FKGIKDSIILSWLHSFGKQFYRSVSKSDYTTMRLGFIIMTHCPGNP--KFDFHRYMVRAL 267  
OsMLO5 FKGIKDSIILSWLHSFVKQFSGSVTKSDYITMRLGFIQTHCRANP--KFDFHRYMVRAL 271  
AtMLO1 FLGIGKDSVILGWTSFLKQFYDSVTKSDYVTLRLGFIIMTHCKGNP--KLNFKHYMMRSL 281  
AtMLO15 FLGVGKADASLGWVQSFMKQFLASVNESDYITMRLGFVTTHCKTNP--KFNFHKYLMRAL 266  
PpMLO1 LQSTRGTGYNISRYIYSFFKQFGKPIISKQDYWCLRYGFITFHNLD-P--KFDFHGYIKRSI 262  
OsMLO11 TSHPW-----LCFLRQFRSIRKSDYMLRLGFIITVRYTHKLPHSYNFHKYIMVRSM 262  
ZmMLO4 ASHPWSKNKILIWMLCFLRQFRGSIIRSDYLALRLGFVT---YHKLPHSYDFHKYIMVRSM 262  
AtMLO4 ASHPWSNNRFLIWMLCFLRQFRGSIIRKSDYFALRLGFLT---KHNLPFTYNFHMYMVRSM 268  
AtMLO11 TSAPLAKNRILIWVTCFFRQFGRSDYLTLRKGFIVN---HHLTLKYDFHSYIMIRSM 281  
AtMLO14 TSAPLVKNRLLIWVICFFRQFGHSVVRSDYLTLRKGFIMN---HHLTLTYDFHSYIMIRSM 276  
OsMLO6 SFRSWSENNAIKCVCFLAQFGQSVVRADYLTILRKGFIIMT---HNLAPTYDFHDMVRSM 286

\* \* : . : \* : \* . \* : \* \* : : :

|           |                                                               |     |
|-----------|---------------------------------------------------------------|-----|
| MLO       | EDDFKVVVGIS-LPLWGVAILTFLDINGVGTLIWISFIPLVILLCVGKLEMIIMEMAL    | 307 |
| TaMLO2-B1 | EDDFKVVVGIS-LPLWCVAILTFLDIDGIGTLTWISFIPLVILLCVGKLEMIIMEMAL    | 308 |
| HvMLO2    | EDDFKVVVRIS-LKLWFVAVLILFLDFDGIIGTLWMSVPLVILLVWVGTKLEMVIMEMAQ  | 330 |
| OsMLO1    | EDDFKVVVGIS-LPLWFGVILVFLDIHGLTLIWIISFVPLIIVLLVGTKLEMVIMEMAQ   | 319 |
| OsMLO2    | EDDFKVVVGIS-LPLWFVAILVFLDIQGFGLTIWISFVPLVILMLVGTKLEMVIMEMAQ   | 332 |
| ZmMLO1    | EDDFKVVVGIS-LPLWFVAIFLFLIDIKGFGTLVWISFVPLVILLVVGAKLEVIMEMAK   | 339 |
| AtMLO2    | EKDFKTVEIS-PVIWFVAVLFLLTNSYGLRSYLWLPFIPLVIVLIVGTKLEVIITKLGL   | 343 |
| AtMLO6    | EEDFKTIVEIN-PVIWFIAVLFLLTNTINGLNSYLWLPFIPFIVLIVGTKLQVIITKLGL  | 340 |
| AtMLO12   | EQDFTVVVGIS-PLIWCIAVLFLTNTHGWSYLWLPFLPLIVLIVGAKLQMIISKLGL     | 334 |
| AtMLO5    | EDDFKVVVGIS-PELWAFVMLFLLFDVHGWTAVITMIPLLLTIAIGTKLQAIISDMAL    | 327 |
| AtMLO9    | EDDFKVVVGIR-PELWAFVMLFLLFDVHGWTAVITMIPLLLTIAIGTKLQAIISYMAL    | 334 |
| AtMLO7    | EDDFKLVVGIS-PVLWASFVIFLLFNVNGWRTLFWASIPPLLIILAVGTKLQAIMATMAL  | 342 |
| AtMLO10   | EDDFKVVVGIS-PLLWASFVIFLLLNNGWEALFWASILPVLIIILAVSTKLQAILTRMAL  | 340 |
| AtMLO8    | EDDFKVVVGVS-PVLWGSFVLFLLLNIDGFKMMFIGTAIPVIIILAVGTKLQAIMTRMAL  | 358 |
| ZmMLO6    | EDDFKVVVGIS-PPLWASALIFLFLNNGWHTMLWISIMPVVIILSVGTKLQGIICRMAI   | 365 |
| OsMLO4    | EDDFKTVVVGIS-APLWASALIMLFNVHGWHNLFWFSTIPLVVTAVGTKLQAIIAMMAV   | 330 |
| ZmMLO2    | EDDFKTVVVGIS-PPLWASALAVMLFNVHGWHNLFWFSAIPLVVLAVGTKLQAIIAMMAI  | 317 |
| AtMLO3    | HEDFKTVVVGIS-PLMWLTVVIFMLLDVSGWRVYFYMSFVPLIIVLVIGTKLEMIVAKMAV | 329 |
| OsMLO7    | EHDfKRVVGIS-WYMWLFVILFLLLNINGWHTYFWLAFPLFLLLVGAKLEHIITRLAQ    | 310 |
| ZmMLO7    | EYEFKRVVGIS-WYLWLFVILFLLLNINGWHTYFWLAFPLFLLLVGAKLEHIITRLAQ    | 314 |
| OsMLO9    | EHDfKEVVGIS-WYLWLFVIVFLLLNINGWHTYFWLSFLPLILLLVGAKLELITRLAQ    | 289 |
| AtMLO13   | EIDFKKVVVIS-WYLWLFVVVFLLLNVGWNTYFWLSFLPLILLLVGAKLEYIISLAL     | 329 |
| HvMLO3    | EVDfKVVVGIS-WYLWAMLMIFFLLLNVEGWYVYIWIITLVPFIMLLVASKMEHIITELAY | 325 |
| OsMLO10   | EDDFKVVVGIS-WYLWAMLIIFFLLLNQGWYVYIWIISAVPFVMLLVGAKLEHIITELAH  | 337 |
| OsMLO3    | EKDYKRVVGIS-WYLWIFVMIFLLLNITGWSYFWISLIPVLLLVGAKLEHIITQLAY     | 319 |
| ZmMLO3    | EKDFKRVVSIK-WYWIIFVMIFLLLNVTGWSYFWISLVLPLALLLVGAKLEHIINRLAY   | 323 |
| OsMLO8    | ESDFKVVVGIS-WYLWVFVIFLLLNNGWHTYFWIAFLP--LIVTVGTKLEHVIAQLAH    | 320 |
| ZmMLO8    | EADfKVVVGIS-WYLWVFVIFLLLNNGWHTYFWIAFLPLILLLVGAKLEHVIAQLAH     | 326 |
| OsMLO5    | EADfKVVVGIS-WYLWIFVMIFLLLNNGWHTYFWISFVPLLLLVGAKLEHVITQLAH     | 330 |
| AtMLO1    | EDDFKQVVGIS-WYLWIFVIFLLLNNGWHTYFWIAFIPFALLLVGAKLEHVIAQLAH     | 340 |
| AtMLO15   | NSDFKVVVGIS-WYLWVFVIFLLLNIVAWHVYFWLAFIPLILLLVGAKLEHIITDLAH    | 325 |
| PpMLO1    | EIDfQHVVGIS-YLWAFVCIYLLVDIHGWSYFWLAFIPLAMILFVGAQLQIVTALVV     | 321 |
| OsMLO11   | EDDYNGSVGISSWPLWAYAIIICIFVNIHGLNIYFWISFAPAILVLLVGTQLQHVIAQLAL | 322 |
| ZmMLO4    | EDDYNGTIGIS-WPLWAYAIVCILNVHGINIYFWLSFVPLVLLVGTQLQHVIAQLAL     | 321 |
| AtMLO4    | EDEFHGIVGIS-WPLWVYAIVCICINVHGLNMYFWISFVPAIVMLVGTKLEHVVSKLAL   | 327 |
| AtMLO11   | EEEEQRIVGVS-GPLWGFVAFMLFNKGSNLYFWIAIIPVTLVLLVGAQLQHVIAQLAL    | 340 |
| AtMLO14   | EEEEQKIVGVS-GPLWGFVVGFMFLFNKGSNLYFWIAIIPITLVLVGAQLQHVIAQLAL   | 335 |
| OsMLO6    | EEEEFEKIVGVS-GLLWGFVVAFMLFNINGSNLYFWIAIIPVTLVLLVGAQLQYVIATLTA | 345 |

. : : \* : : . \* : : : : : :

|           |                                                              |     |
|-----------|--------------------------------------------------------------|-----|
| MLO       | EIQD-RASVIKG-----APVVEPSNKFFWFHHRPDWVWVFFIHLTLFQNAFQM        | 352 |
| TaMLO2-B1 | EIQD-RASVIKG-----APVVEPSNKFFWFHHRPDWVWVFFIHLTLFQNAFQM        | 353 |
| HvMLO2    | EIHD-RESVVKG-----APAVEPSNKYFWFNRPDWVWVFLMHLTLFQNAFQM         | 375 |
| OsMLO1    | EIQD-RATVIQG-----APMVVEPSNKYFWFNRPDWVWVFFIHLTLFHNAFQM        | 364 |
| OsMLO2    | EIQD-RATVIKG-----APVVEPSNKYFWFNRPDWVWVFFIHLILFQNAFQM         | 377 |
| ZmMLO1    | EIQD-KATVIKG-----APVVEPSDRFFWFNRPGWVWVFLIHLTLFQNAFQM         | 384 |
| AtMLO2    | RIQE-KGDVVRG-----APVVQPGDDLFWFGKPRFILFLIHLVLFQNAFQL          | 388 |
| AtMLO6    | RIQE-KGDVVKG-----TPLVQPGDHFVWFGPRFILFLIHLVLFQNAFQL           | 385 |
| AtMLO12   | RIQE-KGDVVKG-----APVVEPGDDLFWFGPRFILFLIHLVLFQNAFQL           | 379 |
| AtMLO5    | EIQE-RHAVIQG-----MPLVNVSDRHFVWFSRPAVLVLIHIFILFQNAFEI         | 372 |
| AtMLO9    | EIQE-RHAVIQG-----MPVVNVSDQHFWFKPDLVLMHIFVLFQNAFEI            | 379 |
| AtMLO7    | EIVE-THAVVQG-----MPLVQGSDFYFWFDCPQLLHLIHFALFQNAFQI           | 387 |
| AtMLO10   | GITE-RHAVVQG-----IPLVHGSDFYFWFNRPQLLHLHLHFALFQNAFQI          | 385 |
| AtMLO8    | GITD-RHAVVQG-----MPLVQGNDEYFWFGRPHLILHLMHFALFQNAFQI          | 403 |
| ZmMLO6    | DITE-RHAVIQG-----IPMVQVSDSYFWFARPTVFLFLIHFQNGFQI             | 410 |
| OsMLO4    | EIKE-RHTVIQG-----MPVVKLSDEHFVWFGKPRVLVHLIHFASFQNAFEI         | 375 |
| ZmMLO2    | EIAE-RHTVIQG-----MPVVKLSDDHFVWFGKPRVLVHLIHFASFQNAFEI         | 362 |
| AtMLO3    | TIKE-NNSVIRG-----TPLVESNDTHFWFSNPRFLLSILHYTLFLNTFEM          | 374 |
| OsMLO7    | EAAVASLSHGTE-----RTPYVKPSKEHFVWGRPEIVLNLHIFILFQNSFEI         | 358 |
| ZmMLO7    | EAA--ISLSNNT-----EVPKIKPKDHFVWFKPELVHLIHFILFQNSFEI           | 360 |
| OsMLO9    | EAA--DCPDEAT-----GNPWTKPKCEHFVWFSKPRIVLHLIHFILFQNSFEM        | 334 |
| AtMLO13   | DVS---EKRSRA-----EEAVITPSDELFWFHRPGIVLQLIHFILFQNSFEI         | 373 |
| HvMLO3    | EVAH-KHTAIRG-----DLVVAPSDDFFWFHHRPKLVLLLIHIVLFQNAFQI         | 370 |
| OsMLO10   | QVAE-KHTAIEG-----ELVVSPSDELFWFHRPKIVLILLIHFILFQNAFEI         | 382 |
| OsMLO3    | EVAT-KHTAVEG-----DIAVSPSDNLFWFHSPRVLVALLRIFILFQNAFEF         | 364 |
| ZmMLO3    | EVAS-KHAAGQGE-----GGIVVSPSDELFWFHRSPRVLVLIHFILFQNAFEF        | 370 |
| OsMLO8    | DVAE-KNSAIEG-----DLVVKPSDDHFWLGRPRIILYLIHFILFQNAFEI          | 365 |
| ZmMLO8    | DVAE-KHTAVEG-----DVIVKPSDEHFVWFGKPRVILYLIHFILFQNAFEI         | 371 |
| OsMLO5    | EVAE-KHSAIEG-----DLVVNPSEHFVWGRPKVILYLIHFILFQNAFEI           | 375 |
| AtMLO1    | EVAE-KHVAIEG-----DLVVKPSDEHFVWFSKQVILYLIHFILFQNAFEI          | 385 |
| AtMLO15   | EVAE-KHIAVEG-----DLVVRPSDDLFWFQSPRVLVLIHFILFQNSFEI           | 370 |
| PpMLO1    | GARR-KAKDNMRGECVLSKITGIKTCPAISPRDELFWFRSPRLLFLHLIHFILFQNAFEL | 380 |
| OsMLO11   | EVVG-ATAPYVG-----TQLKLRDDLFWFGKPRVLWVLIQFISFQNAFEM           | 366 |
| ZmMLO4    | EVAE-ATAPYVG-----SQLKLRDDLFWFGKPRVLWVLIQFISFQNAFEL           | 365 |
| AtMLO4    | EVKEQQTGTSNG-----AQVKPRDGLFWFGKPEILLRLIQFIIFQNAFEM           | 372 |
| AtMLO11   | ENAG-LTEYPSG-----VKLRPRDELFWFNKPELILLSLIHFILFQNSFEL          | 384 |
| AtMLO14   | ENAS-ITEYASG-----IKLRPRDELFWFKPELILLSLIHFIQFQNAFEL           | 379 |
| OsMLO6    | EGAK-MNAYGP-----RIKPRDDLFXFKKPEFLWLIHFILFQNSFEL              | 387 |

. \* : \* : : : \* \* \* : :

|           |                                                                |     |
|-----------|----------------------------------------------------------------|-----|
| MLO       | AHFVWTVATPGLKCCYHTQIGLSIMKVVLGLALQFLCSYMTFPLYALVTQMGSNMKRSIF   | 412 |
| TaMLO2-B1 | AHFVWTVATPGLKCCFHMHIGLSIMKVVLGLALQFLCSYITFPLYALVTQMGSNMKRSIF   | 413 |
| HvMLO2    | AHFVWTVATPGLKCCYHEKMAMSIKVVVLGVAAQILCSYITFPLYALVTQMGSNMKRSIF   | 435 |
| OsMLO1    | AHFVWTVATPGLKCCFHENIWLSEVIVGIVLQVLCYITFPLYALVTQMGSNMKKTIF      | 424 |
| OsMLO2    | AHFVWTVATPGLKCCFHENMGLSIMKVVVGFIFIQFLCSYSTFPLYALVTQMGSNMKKTIF  | 437 |
| ZmMLO1    | AHFVWTVATPDLKCCYHERLGLSIIKVAVGLVQLVLCYITFPLYALVTQMGSNMKKTIF    | 444 |
| AtMLO2    | AFFAWSTYEFNLNCFHESSTADVVIRLVVAVVQILCSYVTLPLYALVTQMGSNMKKTIF    | 448 |
| AtMLO6    | AFFVWSTYEFGLKNCFHESRDVIRISIGLLVQILCSYVTLPLYALVTQMGSNMKKTIF     | 445 |
| AtMLO12   | AFFVWSTYEFGLKNCFHESRDVIRITMGVLIQVLCYITLPLYALVTQMGSNMKKTIF      | 439 |
| AtMLO5    | TYFFWIWYEFGLRSCFHHHFALIIIRVALGVGVQFLCSYITLPLYALVTQMGSNMKRSVF   | 432 |
| AtMLO9    | TYFFWIWYEFGLRSCFHHHFGLIIIRVCLGVGVQFLCSYITLPLYALVTQMGSNMKRSVF   | 439 |
| AtMLO7    | THFFWIWYEFGLKSCFHKDFNLVSVKFLCLGALILCSYITLPLYALVTQMGSNMKKAUF    | 447 |
| AtMLO10   | TYFFWVWYSFGLKSCFHDFKLVIVRLSLGVGALILCSYITLPLYALVTQMGSNMKKAUF    | 445 |
| AtMLO8    | TYFFWIWYEFGLKSCFHDNFKIALVKVAIALGVLCCLSYITLPLYALVTQMGSNMKRSVF   | 463 |
| ZmMLO6    | IYFWILWYEFGLKSCFHDNFVIFARLCLGVVQVLCYITLPLYALVTQMGSNMKRSIF      | 470 |
| OsMLO4    | TYFFWIWYEFGLRSCFHDNFELIIRVCLGVVQVFMCSYITLPLYALVTQMGSNMKRSIF    | 435 |
| ZmMLO2    | TYFFWIWYEFGLRSCFHDNFELIIRVCLGAIIVQFMCSYITLPLYALVTQMGSNMKRSIF   | 422 |
| AtMLO3    | AFIVWITWQFGINSYHDNQGIITRVLAVTVQFLSSYITLPLYAIVTQMGSNMKRSIF      | 434 |
| OsMLO7    | GFFIWLVTFFGFDSCIMEKVVYAIRLVIGVLIQMLCSYVTLPLYAIVTHMGDGIKLGIF    | 418 |
| ZmMLO7    | SFFFWILVSEGFSCMMEKRPVIVIRLVIGVIEVICSYITLPLYAIVTHMGDGIKLGIF     | 420 |
| OsMLO9    | GFFFVWLVATYGFDSICIMENKIYALPRLAIGIIVQVLCYITLPLYAIVTHMGDGIKLGIF  | 394 |
| AtMLO13   | AFFFWILFTYGIHSCIMEKLVYIPLVVMGVVQVLCYITLPLYALVTQMGSNMKRSIF      | 433 |
| HvMLO3    | AFFFWLVVYTYGFKSCIMGKPAVITRIVVIVICQILCGYSTLPLYAIVSHMGSSFKKTFIF  | 430 |
| OsMLO10   | AFFFWLVVYTYGFKSCIMGKGVVIAIRLVV--ISQLLGGYSTLPLYAIVSHMGSSFKKTFIF | 440 |
| OsMLO3    | AYFIWTVATFGFNCSIMDRLPYRVSRIISCVVQVLCYITLPLYAIVSHMGSSFKSAVF     | 424 |
| ZmMLO3    | AYFFWTLAMFGANCSIMDSLGYSVSRIICVQVQVLCYITLPLYAIVSHMGSSFKSAVF     | 430 |
| OsMLO8    | AFFFWILVYTYGFSYIMGQVGFIVPRLVIGVVIQVLCYITLPLYAIVTQMGSNMKRSIF    | 425 |
| ZmMLO8    | AFFFWILVYTYGFSYIMGQVRFIVPRLVIGVVIQVLCYITLPLYAIVTQMGSNMKRSIF    | 431 |
| OsMLO5    | AFFFWILVYTYGFSYIMDHPVFIILTRLIIGAIQVLCYITLPLYAIVTQMGSNMKRSIF    | 435 |
| AtMLO1    | AFFFWILVYTYGFSYIMGQVRFIVPRLVIGVVIQVLCYITLPLYAIVTQMGSNMKRSIF    | 445 |
| AtMLO15   | AFFFWILVYTYGFSYIMDHPVFIILTRLIIGAIQVLCYITLPLYAIVTQMGSNMKRSIF    | 430 |
| PpMLO1    | AFFFWIMFTYGYSSCLVGTVMVVVIRLVGLVFLQILCSVSTLPLYALVTQLGSKMMLTVF   | 440 |
| OsMLO11   | ATFVWVSLNEMAPVLCN-----IFLISMFSAILVQFWCSYNTLPLNVIITQMGSNMKRSIF  | 421 |
| ZmMLO4    | ATFVWVSLWELSAQTCFMKHYVMVAIRLISGLLVQFWCSYNTLPLNVIISQMGSNMKRSIF  | 425 |
| AtMLO4    | ATFVWVSLWELSAQTCFMKHYVMVAIRLISGLLVQFWCSYNTLPLNVIITQMGSNMKRSIF  | 432 |
| AtMLO11   | ASFFWFWWQFGYSSCFLNHLYVYFRLLLGAFQFLCSYNTLPLYALVTQMGSNMKRSIF     | 444 |
| AtMLO14   | ASFFWFWWQFGYNSCFLNHLLVYLRLLILGFSGQFLCSYNTLPLYALVTQMGSNMKRSIF   | 439 |
| OsMLO6    | ASFFWFWWQFGYDSCFKNHLLVYCRLLILGFSGQFLCSYNTLPLYALVTQMGSNMKRSIF   | 447 |
|           | : : * : ..*.*: .: : : :                                        |     |

|           |                                                                  |     |
|-----------|------------------------------------------------------------------|-----|
| MLO       | D-EQTSKALTNWRN--TAKEKKKVRDMDLMAQMI-GDATPSRGSSPMP-----SRGSSP      | 463 |
| TaMLO2-B1 | D-EQTAKALTNWRN--TAKEKKKVRDMDLMAQMI-GDATPSRGASPMP-----SRGSSP      | 464 |
| HvMLO2    | D-EQTAKALTNWRK--MAKEKKKARDAAMLMAQMG-GGATPSVG-----SSP             | 478 |
| OsMLO1    | E-EQTMKALMNWRK--KAMEKKKVRDADAFLAQMS-VDFATPAS-----SRSASP          | 470 |
| OsMLO2    | E-EQTMKALMNWRK--TAREKKKLRDADEFLAQMS-GDTTP-----SRGSSP             | 480 |
| ZmMLO1    | E-EQTAKAVMKWRK--TAKDKVRQREAAAGFLDVLTSADTTPSHSRATSP-----SRGNSP    | 496 |
| AtMLO2    | N-DRVATALKKWHH--TAKNETKHGRHSGSNTPFSSRPTTPTHG-----SSP             | 492 |
| AtMLO6    | N-ERVATALKSWHH--TAKKNIKHGRTSESTPFSSRPTTPTHG-----SSP              | 489 |
| AtMLO12   | N-DRVANALKKWHH--TAKKQTKHG-HSGSNTPHSSRPTTPTHG-----MSP             | 482 |
| AtMLO5    | D-DQTSKALKNWHK--NAKKKSE-----TPGQTPPL-----PNLR                    | 464 |
| AtMLO9    | D-EQTSKALEQWHK--KARKKNE-----K-----                               | 460 |
| AtMLO7    | D-EQMAKALKKWHK--DIKLLKKGARKLPSKTLG--VSEFSLSSS-----SS             | 490 |
| AtMLO10   | D-EQMAKALKKWHM--TVKKKKGKARKPPETLG--VSDTVSTSTSS-----FHAS          | 491 |
| AtMLO8    | D-EQTSKALKKWRM--AVKKKKG--VKATTKRLGGDSASPTASTVR-----STSS          | 509 |
| ZmMLO6    | D-EQTSKALKNWRRA--GAKKKAP-----                                    | 490 |
| OsMLO4    | D-EQTAKALKKWHKA--AVVKKKQKQKSSSHEPGSETPGTETTTTTTATATEESQRERDAAAMP | 494 |
| ZmMLO2    | D-EQTAKALKKWHK--AVVKKKHKDSSHNS-SETP---STDTTGPAGEAGEWQR--LHEVP    | 475 |
| AtMLO3    | E-EQLANVLRHWQG--MVRDKKTIQTPDNDNNSNNNGDIDSG-----ESP               | 478 |
| OsMLO7    | G-SGLHESVAGWALDARRKKEEQ-----QSSH                                 | 444 |
| ZmMLO7    | G-SRVHESVHGWI--LRKKPFS-----FWKI                                  | 444 |
| OsMLO9    | G-ETVHVSVHSWATDVRKKKAAPPSSHRLIPF-----LMKR                        | 430 |
| AtMLO13   | D-NVVQSTLEGWLEDTRNRGEST-----                                     | 455 |
| HvMLO3    | D-ENVTEGLVNWAEKARRGTRTPN-----KIT                                 | 456 |
| OsMLO10   | D-ENVVEGLANWAQNARR--RNARA-----ART                                | 465 |
| OsMLO3    | S-DDVADNLRKWADEARRRTGRAA-----AGV                                 | 450 |
| ZmMLO3    | V-DDVADNLRGWADGARRRVRSA-----TGV                                  | 456 |
| OsMLO8    | N-DHVQQGVLGWAQKVKMRKGLK-----                                     | 447 |
| ZmMLO8    | N-EHVQQGVLGWAQKVKMKKGLKG-----AAS                                 | 457 |
| OsMLO5    | D-EHVQQGLVGWAQKAKKRKGLKE-----SNG                                 | 461 |
| AtMLO1    | E-ENVQVGLVGWAQKVKQKRDLLKA-----AAS                                | 471 |
| AtMLO15   | N-EQTQEHLVGWAKMAK--RGVKK-----G--                                 | 452 |
| PpMLO1    | RSESTGVALKGWAKSAKRRHSHPDHVHVPISFN-----SSIS                       | 477 |
| OsMLO11   | S-ESVRESLHSWCKRVKDKNRHN-----LASRS                                | 448 |
| ZmMLO4    | S-ENVRESLHSWCKRVKDRSRHNPLFSRNGT-----LITRS                        | 460 |
| AtMLO4    | A-ESVRDSLHSWCKRVKERSKHT-----RS                                   | 456 |
| AtMLO11   | P-QRIRETIRGWGKATRKRHRHGLYGDSTVR-----TETST                        | 480 |
| AtMLO14   | P-QRVRETINGWGKATRKRHRHGLYGDSTIR-----TETST                        | 475 |
| OsMLO6    | P-RRIRETMHGWGKDPRRRRKHKRGGDSTIR-----TETST                        | 483 |

: \*

|           |                                |                                                     |                                              |     |
|-----------|--------------------------------|-----------------------------------------------------|----------------------------------------------|-----|
| MLO       | VHLLHKGMGR----                 | SDDPQSAPTS-----                                     | -----PRTQQEARDMYPVVVAHPVH-----               | 503 |
| TaMLO2-B1 | VHLLHKGMGR----                 | SDDPQSTPTS-----                                     | -----PRAMEEARDMYPVVVAHPVH-----               | 504 |
| HvMLO2    | VHLLHKAGAR----                 | SDDPQSVPAS-----                                     | -----PRAEKEGGG-----VQHPAR-----               | 513 |
| OsMLO1    | VHLLQDHRAR----                 | SDDPPSPITV-----                                     | -----ASPPAPEEDMYPVPAASR--Q--                 | 511 |
| OsMLO2    | VHLLHKQVRV----                 | SEDPSPAPAS-----                                     | -----PGFAGEARDMYPVVPVVRPHG--                 | 523 |
| ZmMLO1    | VHLLHKYRGR----                 | SEEPQSGPAS-----                                     | -----PGR--ELGDMYPVADQHRHL-----               | 534 |
| AtMLO2    | IHLHNFNRR--                    | SVENYPSSPSP-----                                    | -----RYSGHGHEHQFWDPEAQEAETS--                | 538 |
| AtMLO6    | IHLRNAPHK--                    | RSRVSDEFAN-----                                     | -----SFSPR-NSDFDSWDPEAQETAETSNS              | 536 |
| AtMLO12   | VHLLHNYNRRSLDQQTSTASPSPP-----  | -----RFSYSGQGHGHQHFDPESQNHYSYQRE--                  | 535                                          |     |
| AtMLO5    | PKTGGDIESA--                   | SPANITASVDV-----                                    | -----KESDQSQSR-----DLLSGP-----               | 500 |
| AtMLO9    |                                |                                                     |                                              |     |
| AtMLO7    | ATTLHRSKTT--                   | GHSSNIYYKQ-----                                     | -----EDEEDEMSE-----DLEAG--AEDAI              | 529 |
| AtMLO10   | GATLLRSKTT--                   | GHST--ASVMS-----                                    | -----NFEDQSMS-----DLEAEPLSPEPI               | 530 |
| AtMLO8    | VRSLQRYKTT--                   | PHSMRYEGLDP-----                                    | -----ETSDLDTDN-----EALTPPKSPSPF              | 551 |
| ZmMLO6    | ---                            | TGGSKHG--GGGSPTAGGSP-----                           | -----TKADGDA-----                            | 515 |
| OsMLO4    | VRHLHRYKTI--                   | AHVG-ATGTLSE-----                                   | -----DSDCSDTDT--PFASPTRLIPPTK                | 537 |
| ZmMLO2    | VRHLHRYKTI--                   | AHVGVRSPLE-----                                     | -----DPDYSDTDDTEPLSLQTRHLIPPAK               | 521 |
| AtMLO3    | VQTEVASEFR--                   | FSGRQSPILQ-----                                     | -----ETIQIEKTER-----                         | 508 |
| OsMLO7    | GGATGATEGSNLQERPTSGPRRAA----   | -----PWRRRHLLPPTWSRSPSPPTTTATTAAT                   | 499                                          |     |
| ZmMLO7    | PGGDPNADSG----                 | READVTRRVA----                                      | -----KERSGSSRSMPMAPADEIVTVDDVAVAAA           | 494 |
| OsMLO9    | RHSTRGADDAADDAGDGDVHHHHHH----- | -----GHHHHGHHHHEGSSAAAAAPDLEEIVATTS                 | 485                                          |     |
| AtMLO13   |                                |                                                     | -----SEAHRIEMQPTTPESYNV                      | 473 |
| HvMLO3    | TDASSPIDE-----                 | ANGG-----                                           | -----IVQMTNTRANSVQGTARLI-----                | 491 |
| OsMLO10   | QNVGDSPVDE-----                | SNVG-----                                           | -----EVQMTSP-PTKSVQGTARLI-----               | 499 |
| OsMLO3    | G--                            | CLGAAAG-----                                        | -----SSR-----REGIHIQNM-----                  | 470 |
| ZmMLO3    | DASCLGTPAA-----                | AGRGWE-----                                         | -----GAAGWRLIAGRP SRPTQQPRISF-----           | 496 |
| OsMLO8    | ---                            | EGSAGGG-----                                        | -----DTAGPS-----VKIEMMRAAREGND EAGVSI E----- | 482 |
| ZmMLO8    | ASKDESITNA-----                | DSAGPS-----                                         | -----VKIEMAK--AGEDVEIVGNTG-----              | 492 |
| OsMLO5    | AMAGAGSTNG-----                | SSQPSS-----                                         | -----ILQMVRAAAASEGSSNGGDMRTNQ--              | 502 |
| AtMLO1    | NGDEGSSQAGPGPDSGSGSAPAAGP----  | -----GAGFAGIQLSRVTRNNAGDTNNEITPDHNN                 | 526                                          |     |
| AtMLO15   | ATQVGTSHDA-----                | TSPRPS-----                                         | -----IQLNSLLGKGSQQNQNPKEKSEIAHHD             | 496 |
| PpMLO1    | NEEPHVTKKEHHLHVLGLDKQVDAG----  | -----GHVVDIVPGTTQHLGQKHQHNDHNHLNGDD                 | 532                                          |     |
| OsMLO11   | VCSLDTTYEETDHEATATVGTLSRT----- | -----VSATSLDEELTVATVEDND-----                       | 491                                          |     |
| ZmMLO4    | VCSLDTTY-ETDHEATVGTLSRT-----   | -----ASATSLDDQLTVVTVDD-----                         | 500                                          |     |
| AtMLO4    | VCSLDTAT-IDERDEMTVGTLSRS-----  | -----SSMTSLN-QITINSIDQAESIFGA                       | 502                                          |     |
| AtMLO11   | IASLEEYD--                     | HQVLDVTETSFEEQQRKQQEQGTTELELQPIQPRNDCVPNDTSSRVGTPLL | 538                                          |     |
| AtMLO14   | IASVDEYN--                     | DQVLDVSETSPVQD-----                                 | -----NELELQLIRG-----ACGNSSSVETPIL            | 520 |
| OsMLO6    | VCSLDDDDGDEHGQFVETTPSRP-----   | -----YLKIQQLPLRSGGXSARPGTPCHPGVVGL                  | 536                                          |     |

|           |                                                              |     |
|-----------|--------------------------------------------------------------|-----|
| MLO       | --RLNPNDRRRSASSSALDADIPS-----ADFSFSQG-----                   | 533 |
| TaMLO2-B1 | --RLNPADRRRSVSSSALDADIPS-----ADFSFSQG-----                   | 534 |
| HvMLO2    | --KVPPCDGWRSSASSPALDAHIPG-----ADFGFSTQR-----                 | 544 |
| OsMLO1    | -LLDDPPDRRWMASSS---ADIAD-----SDFSFSQAR-----                  | 540 |
| OsMLO2    | -FNRTDPDKRRAASSSAIQVDIAD-----SDFSFSVQR-----                  | 555 |
| ZmMLO1    | --RLDP-ERM RPASSTAVNIDIAD-----ADFSFSMR-----                  | 563 |
| AtMLO2    | THHS-LAHESSEP--VLASVELPP---IR---TSKSLRDFSFKK-----            | 573 |
| AtMLO6    | NHRSRFGEESEKKFVSSSVLPPGPGQIRTQHEISTISLRDFSFKR-----           | 583 |
| AtMLO12   | ITDSEFNSNHHQVDMASPVREK---EIVEH--VKVDLSEFTFKK-----            | 576 |
| AtMLO5    | -----                                                        |     |
| AtMLO9    | -----                                                        |     |
| AtMLO7    | D---RIQQQ--EMQFHNS-----                                      | 542 |
| AtMLO10   | EGHTLVRVGDQNTIEIYTGDISPG-----NQFSFVKNVPANDID----             | 569 |
| AtMLO8    | ELVVKVEPNKNTGETSRDTEIDS-----KEFSFVKPAPSNESSQDR--             | 593 |
| ZmMLO6    | -----                                                        |     |
| OsMLO4    | QRSLDAGRAEVRVDVDSPTPTPPE-----RHDSFSFPR-LPAHNLQK--            | 580 |
| ZmMLO2    | QRSLDTERAEVRVNVVETAAAPSDV-----LQDSFSFPRLLPPRHVPDK--          | 565 |
| AtMLO3    | -----                                                        |     |
| OsMLO7    | VGDD-----                                                    | 503 |
| ZmMLO7    | VGQGP-----                                                   | 499 |
| OsMLO9    | GGEDGHPAPPPPPQGRP-----                                       | 504 |
| AtMLO13   | QSENP-----                                                   | 478 |
| HvMLO3    | -----                                                        |     |
| OsMLO10   | -----                                                        |     |
| OsMLO3    | -----                                                        |     |
| ZmMLO3    | -----                                                        |     |
| OsMLO8    | -----                                                        |     |
| ZmMLO8    | -----                                                        |     |
| OsMLO5    | -----                                                        |     |
| AtMLO1    | -----                                                        |     |
| AtMLO15   | -----                                                        |     |
| PpMLO1    | HHQNPKPVVHAQGDSTTEVAEDPGTIVNESQVRVGDVPGNEENKS-----           | 580 |
| OsMLO11   | -----DDEMSRIEQEIDRSL-----                                    | 507 |
| ZmMLO4    | -----EPSCIEKDV-----                                          | 509 |
| AtMLO4    | AASSSPQDGYTSRVVEYLSEYNNIGSIPPLNDEIEIEIEGEEEDNGRGSSENNGDA     | 562 |
| AtMLO11   | RPWLSISSPTTTIELRSEPMETLSRSSLP----SEKRV-----                  | 573 |
| AtMLO14   | RPCASSS-TTF SRLQTE TDSLRS SLP----MRREC-----                  | 554 |
| OsMLO6    | PPLHSVSTQGS SHPMLQRQASSLSAPSSPSPRGGGMRSMSMPGFASLTRTPGGSCPGTG | 596 |



|           |                  |
|-----------|------------------|
| MLO       | -----            |
| TaMLO2-B1 | -----            |
| HvMLO2    | -----            |
| OsMLO1    | -----            |
| OsMLO2    | -----            |
| ZmMLO1    | -----            |
| AtMLO2    | -----            |
| AtMLO6    | -----            |
| AtMLO12   | -----            |
| AtMLO5    | -----            |
| AtMLO9    | -----            |
| AtMLO7    | -----            |
| AtMLO10   | -----            |
| AtMLO8    | -----            |
| ZmMLO6    | -----            |
| OsMLO4    | -----            |
| ZmMLO2    | -----            |
| AtMLO3    | -----            |
| OsMLO7    | -----            |
| ZmMLO7    | -----            |
| OsMLO9    | -----            |
| AtMLO13   | -----            |
| HvMLO3    | -----            |
| OsMLO10   | -----            |
| OsMLO3    | -----            |
| ZmMLO3    | -----            |
| OsMLO8    | -----            |
| ZmMLO8    | -----            |
| OsMLO5    | -----            |
| AtMLO1    | -----            |
| AtMLO15   | -----            |
| PpMLO1    | -----            |
| OsMLO11   | -----            |
| ZmMLO4    | -----            |
| AtMLO4    | GETLLELFRRT- 573 |
| AtMLO11   | -----            |
| AtMLO14   | -----            |
| OsMLO6    | AGTPTRLSDARN 608 |
